# Supplementary material for: Genome-wide census of ATF4 binding sites and functional profiling of trait-associated genetic variants overlapping ATF4 binding motifs
Source: PubMed Central journal article supplement (PMC10637723; doi:10.1371/journal.pgen.1011014), 2023-10-31
Supplement: pgen.1011014.s001.pdf [file pgen.1011014.s001.pdf]

# Supplementary Figure S1

| <u>Cell type</u> | <u>HOMER top <i>de novo</i> motif</u> | <u>Enrichment<br/>P value</u> | <u>% of target<br/>sequences</u> | <u>% of background<br/>sequences</u> |
|------------------|---------------------------------------|-------------------------------|----------------------------------|--------------------------------------|
| All combined     |                                       | 1e-208374                     | 67.25%                           | 1.73%                                |
| HAP1             |                                       | 1e-39390                      | 70.46%                           | 1.45%                                |
| HepG2            |                                       | 1e-10199                      | 72.45%                           | 2.01%                                |
| K562             |                                       | 1e-42662                      | 63.74%                           | 1.64%                                |
| MSC              |                                       | 1e-578                        | 56.57%                           | 0.57%                                |
| DLD1             |                                       | 1e-395                        | 69.00%                           | 1.18%                                |
| HUDEP2           |                                       | 1e-6973                       | 64.37%                           | 0.39%                                |
| Erythroblast     |                                       | 1e-4094                       | 65.18%                           | 1.96%                                |
