# Supplementary material for: Genome-wide census of ATF4 binding sites and functional profiling of trait-associated genetic variants overlapping ATF4 binding motifs
Source: PubMed Central journal article supplement (PMC10637723; doi:10.1371/journal.pgen.1011014), 2023-10-31
Supplement: pgen.1011014.s003.pdf [file pgen.1011014.s003.pdf]

# Supplementary Figure S3

**A**

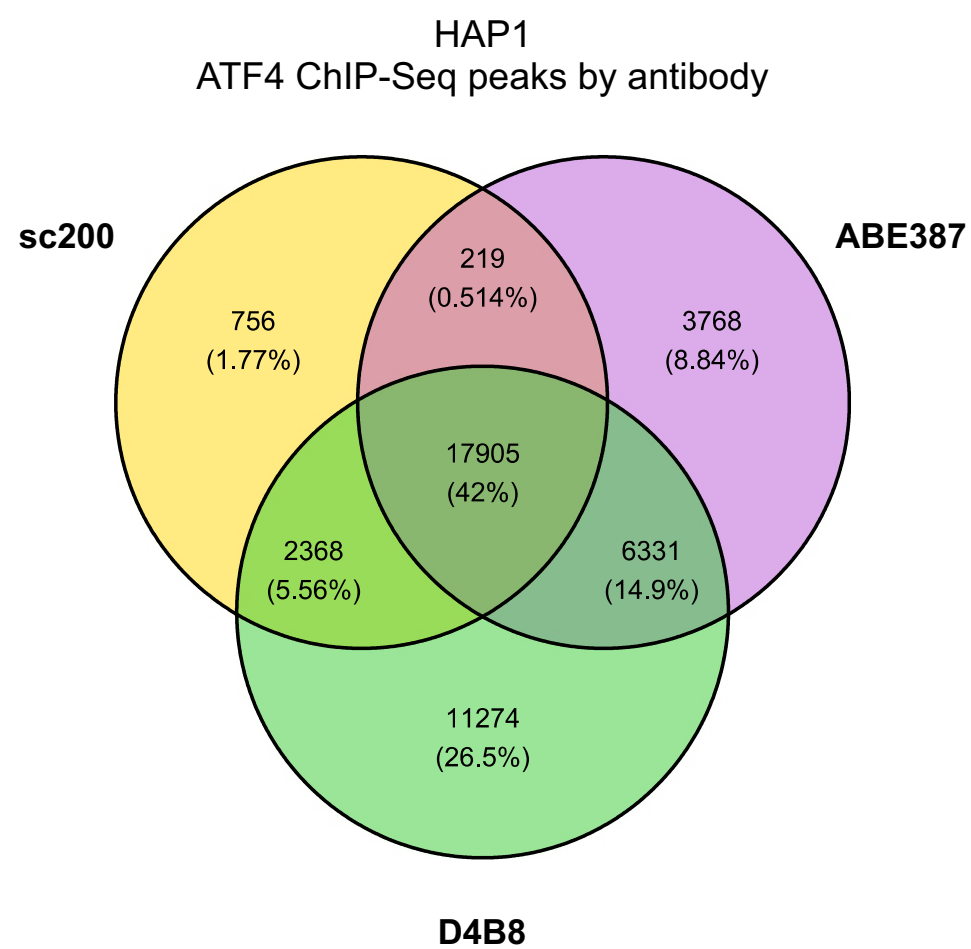

**B**

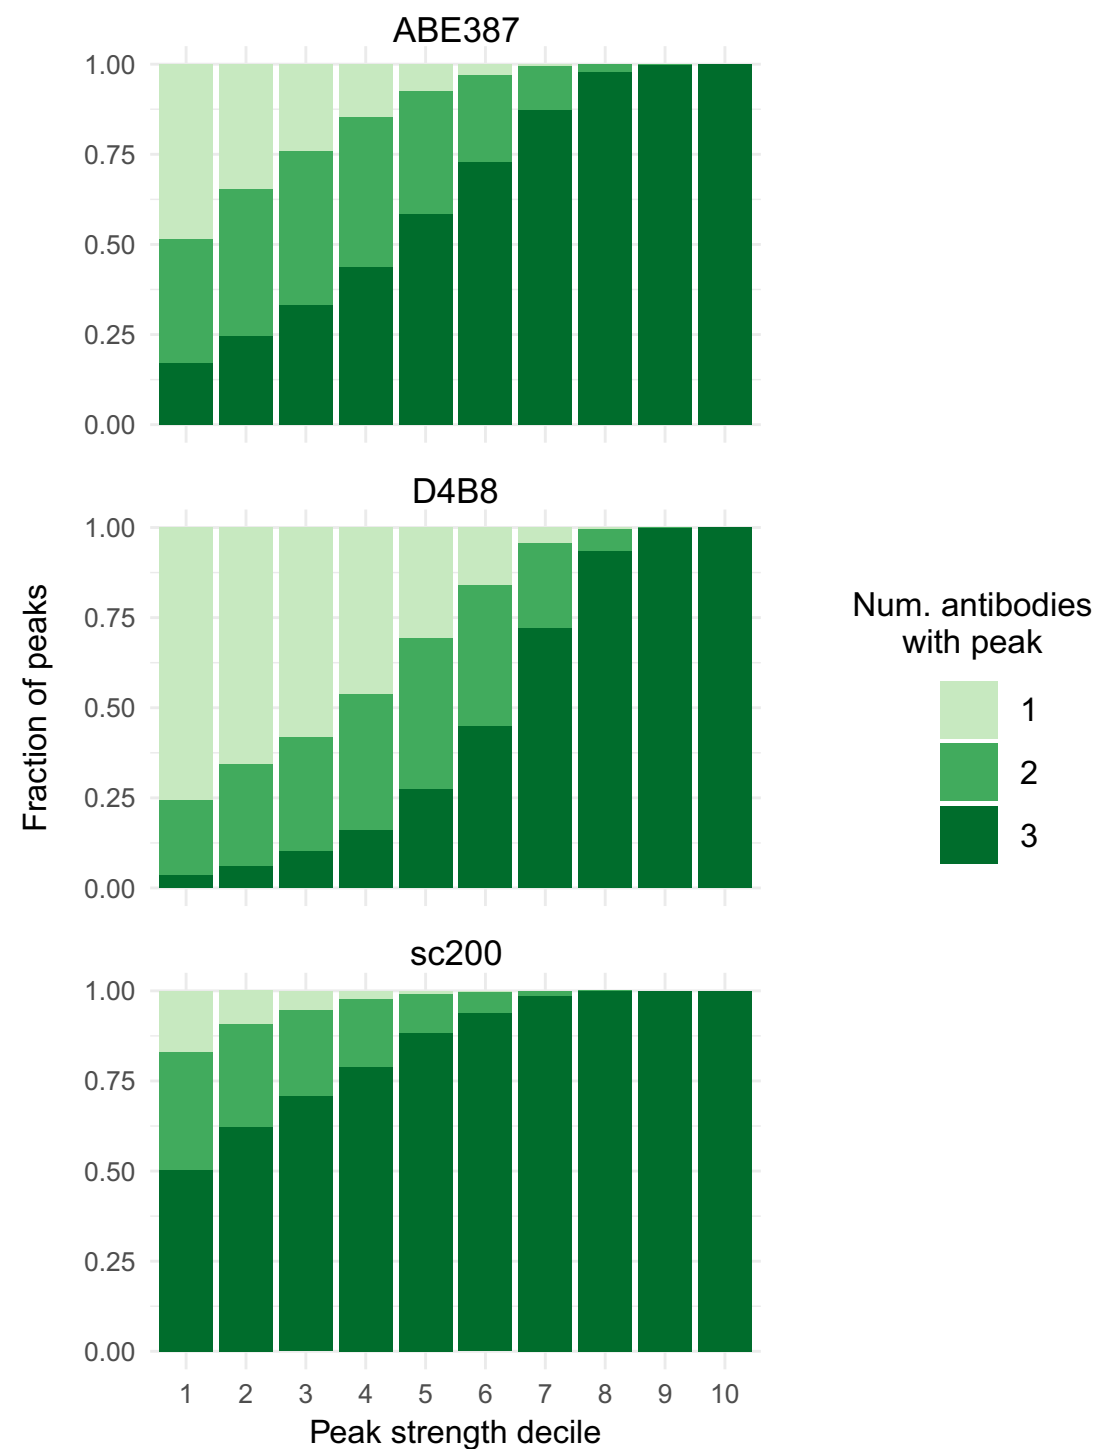

**C**

ATF4 antibody

HOMER *de novo* motif

ABE387

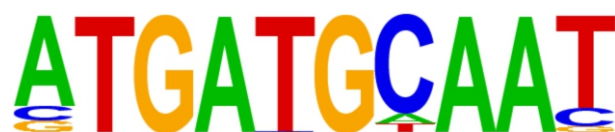

Enrichment P value: 1e-27901  
% of target sequences: 71.43%  
% of background sequences: 1.85%

D4B8

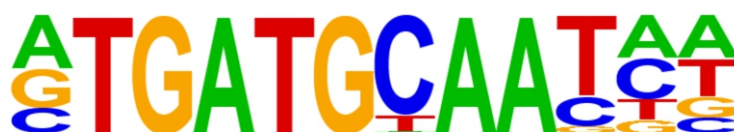

Enrichment P value: 1e-39390  
% of target sequences: 70.46%  
% of background sequences: 1.45%

sc200

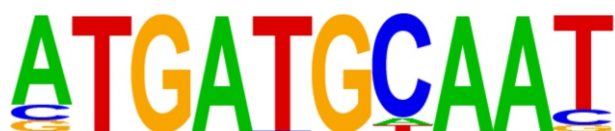

Enrichment P value: 1e-23811  
% of target sequences: 77.39%  
% of background sequences: 1.85%
