# Supplementary material for: Genome-wide census of ATF4 binding sites and functional profiling of trait-associated genetic variants overlapping ATF4 binding motifs
Source: PubMed Central journal article supplement (PMC10637723; doi:10.1371/journal.pgen.1011014), 2023-10-31

# Supplementary Figure S6

A

Top *de novo* motif  
for ATF4 ChIP-Seq peaks

ATGATGCAAT

|                           |           |
|---------------------------|-----------|
| Enrichment P value        | 1e-208374 |
| % of target sequences     | 67.25%    |
| % of background sequences | 1.73%     |

C/EBP-ATF consensus

NTGATGNAAN

HOMER motif collection

Atf4(bZIP)/MEF-Atf4-ChIP-Seq(GSE35681)/Homer

ATGATGCAAT

B

Genetic variants with motif match

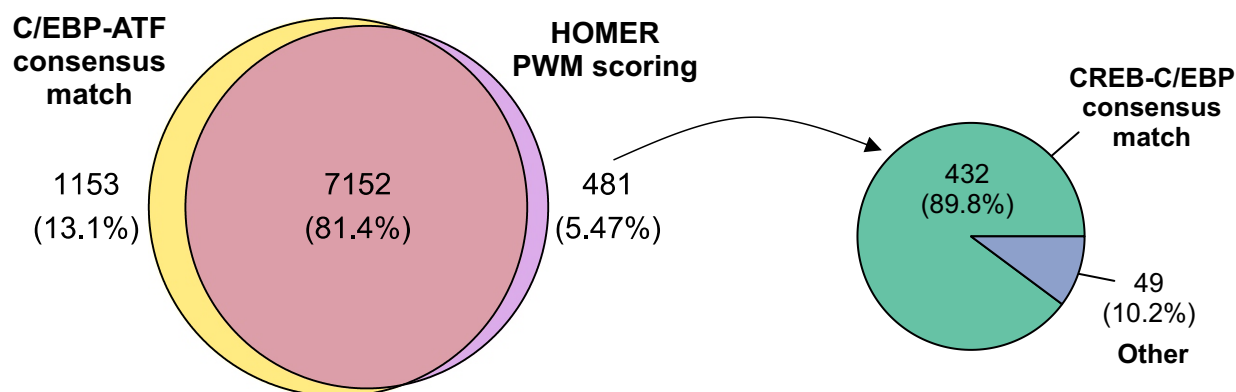

C

Genetic variants with match to HOMER *de novo* PWM (n=7633)

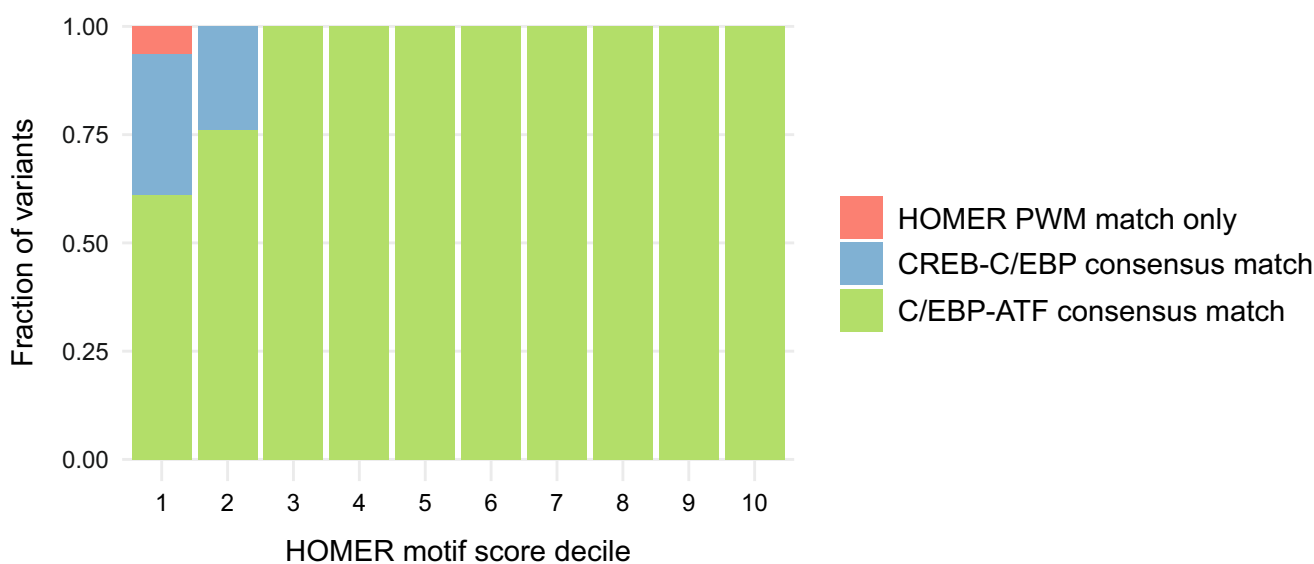

Supplement: pgen.1011014.s006.pdf [file pgen.1011014.s006.pdf]
