# Supplementary material for: Genome-wide census of ATF4 binding sites and functional profiling of trait-associated genetic variants overlapping ATF4 binding motifs
Source: PubMed Central journal article supplement (PMC10637723; doi:10.1371/journal.pgen.1011014), 2023-10-31

# Supplementary Figure S8

**A**

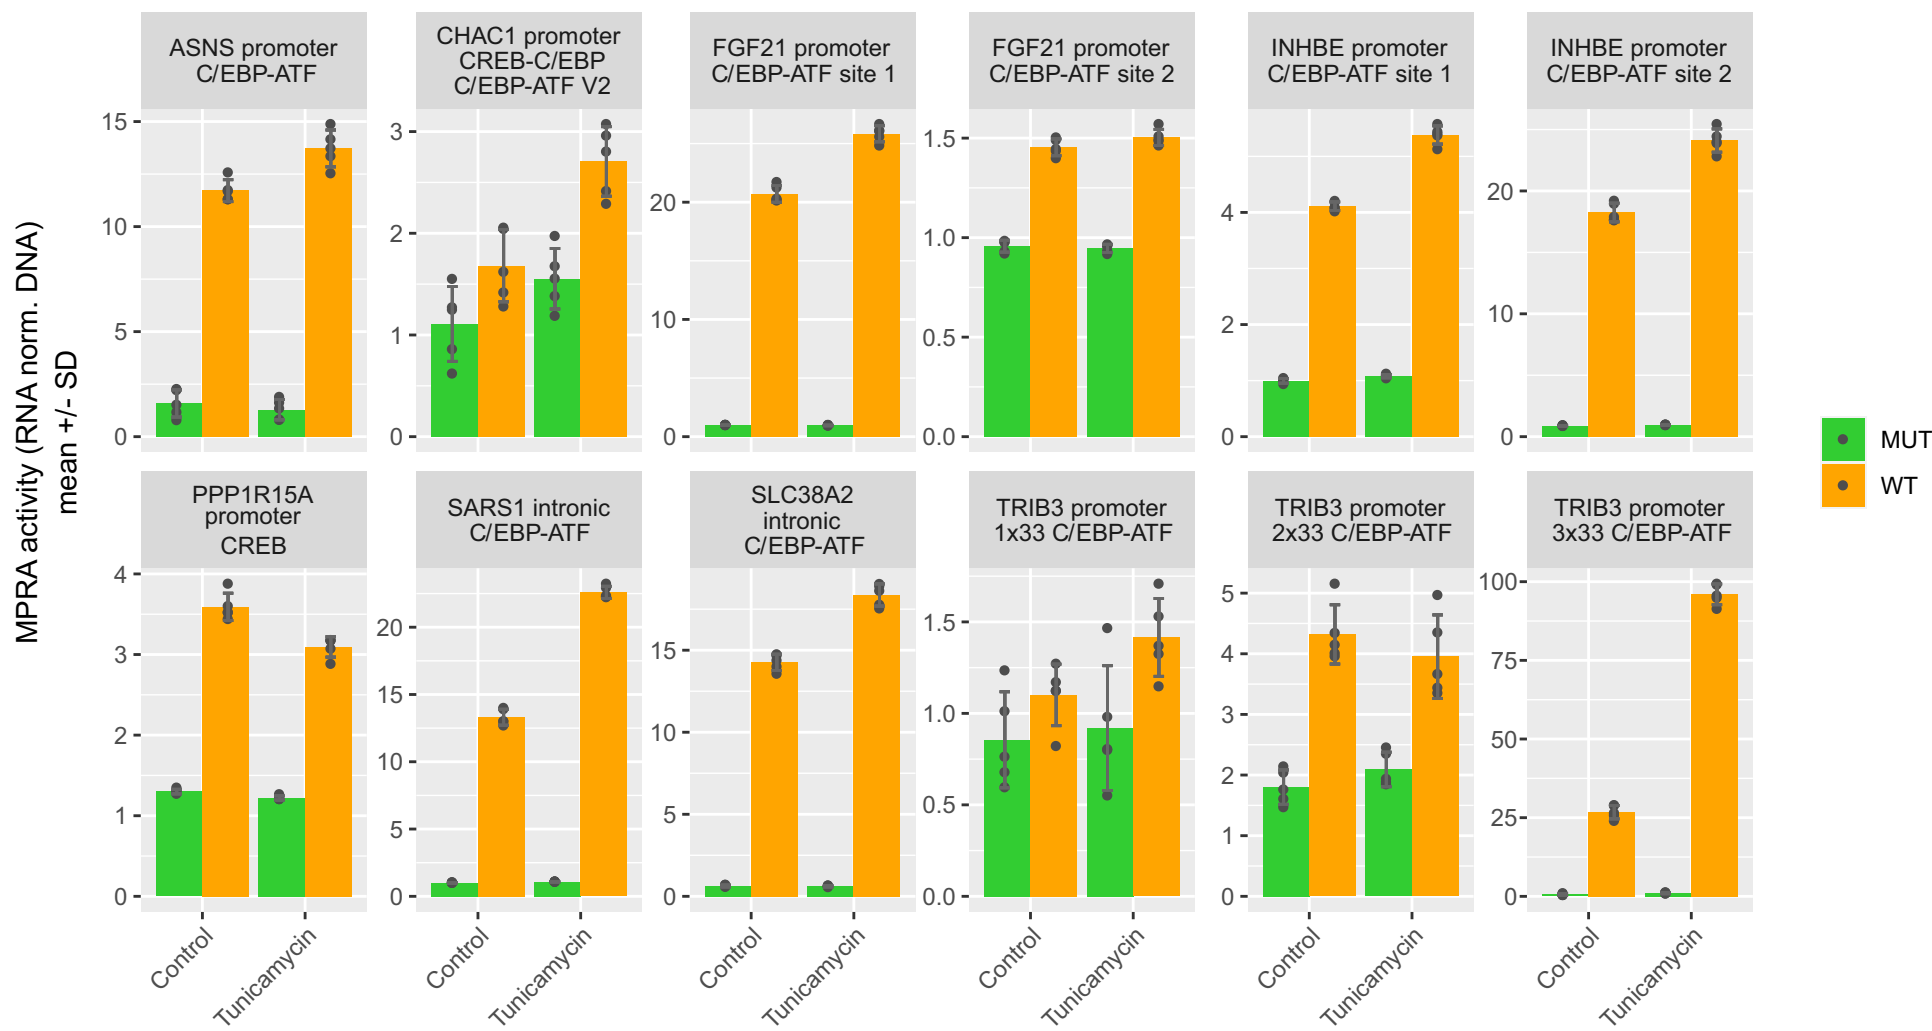

**B**

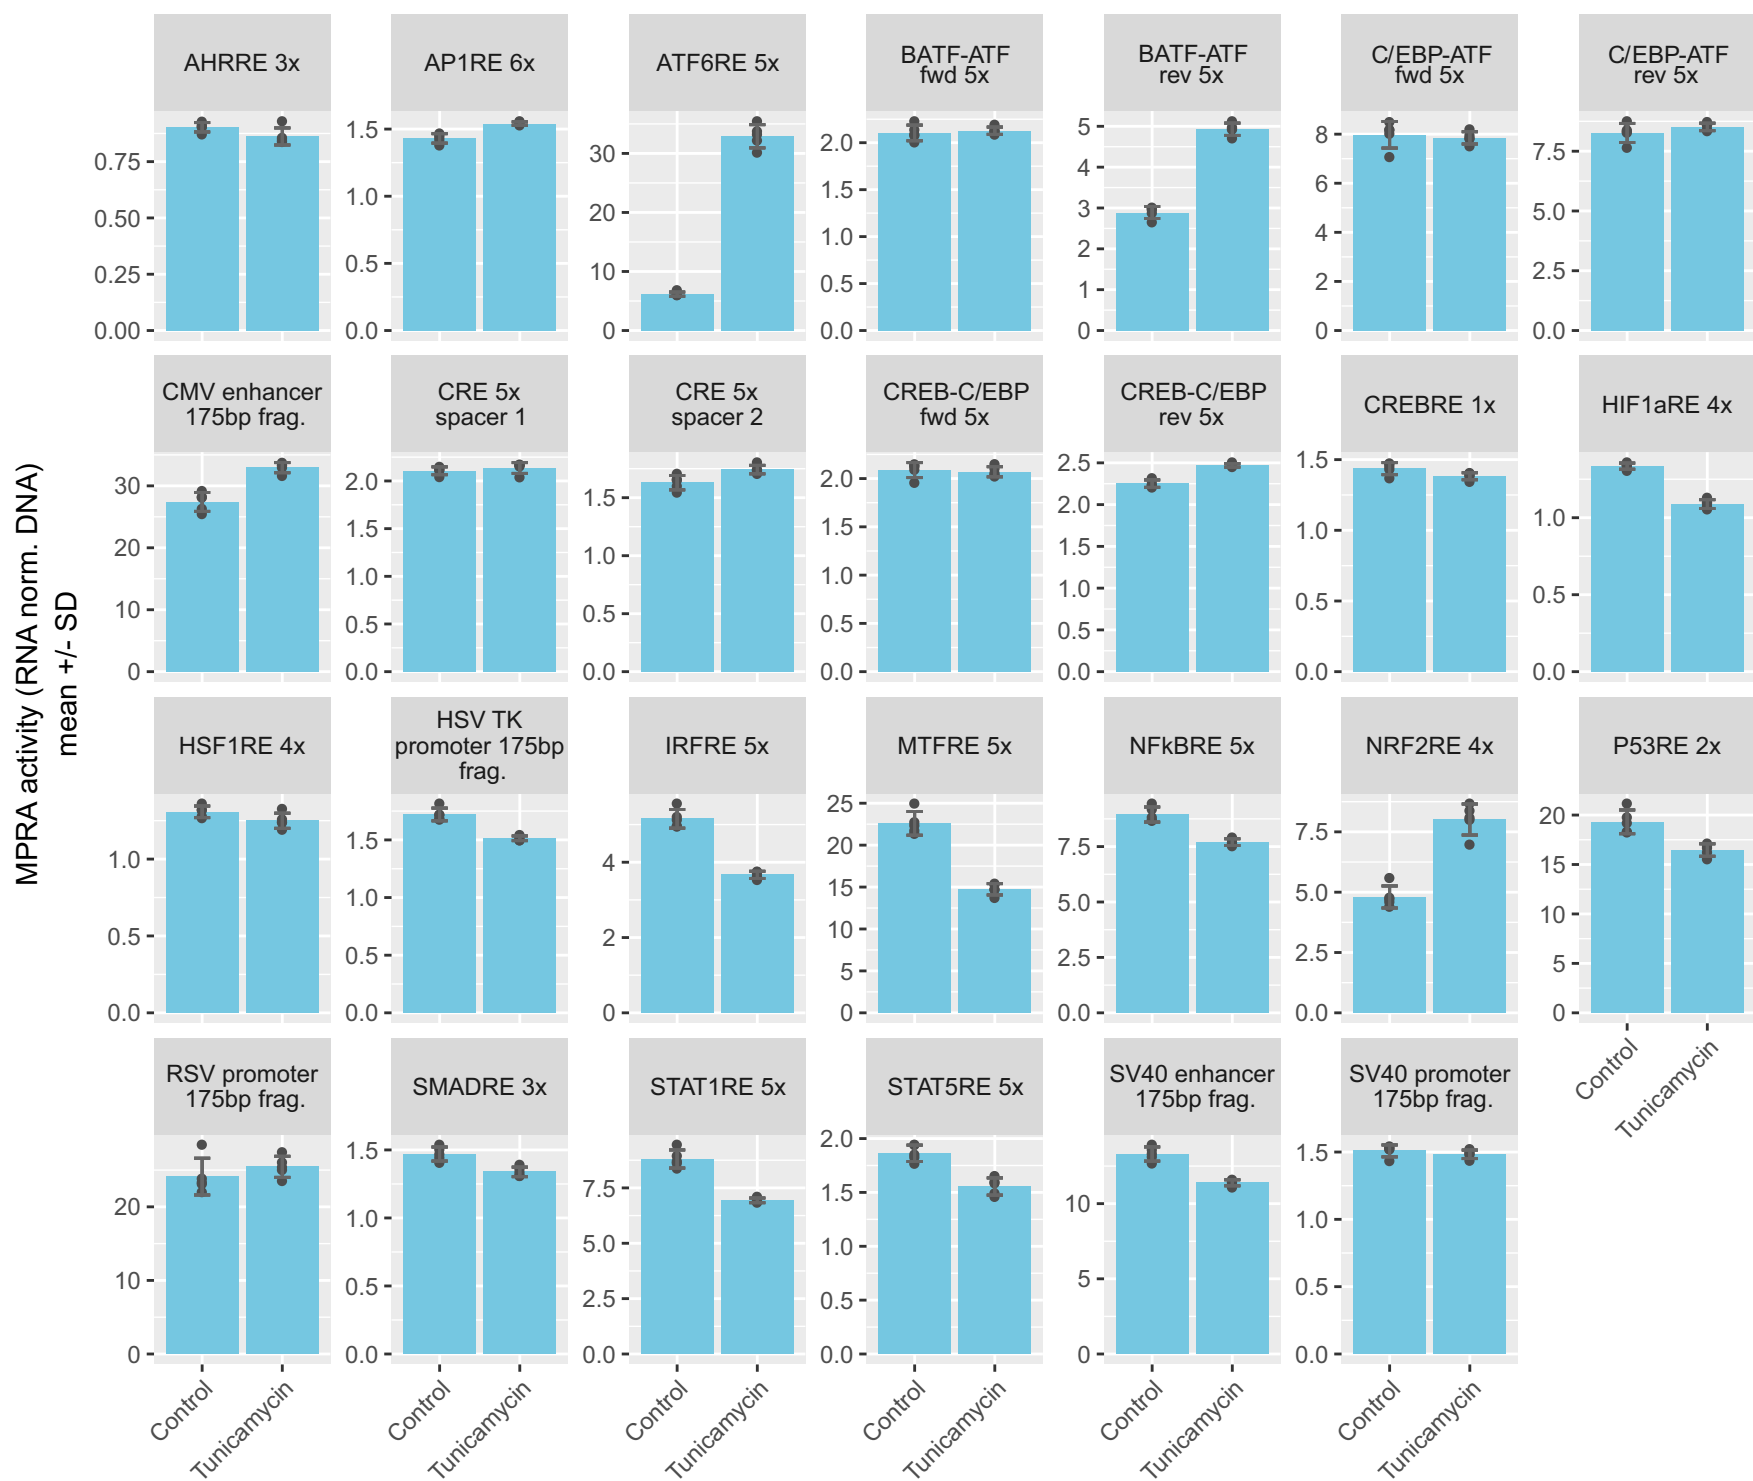

Supplement: pgen.1011014.s008.pdf [file pgen.1011014.s008.pdf]
